# Supplementary material
Source: PubMed Central journal article supplement (PMC3937777)
Supplement: supp_127.5.1104_JCS143743.pdf [file supp_127.5.1104_JCS143743.pdf]

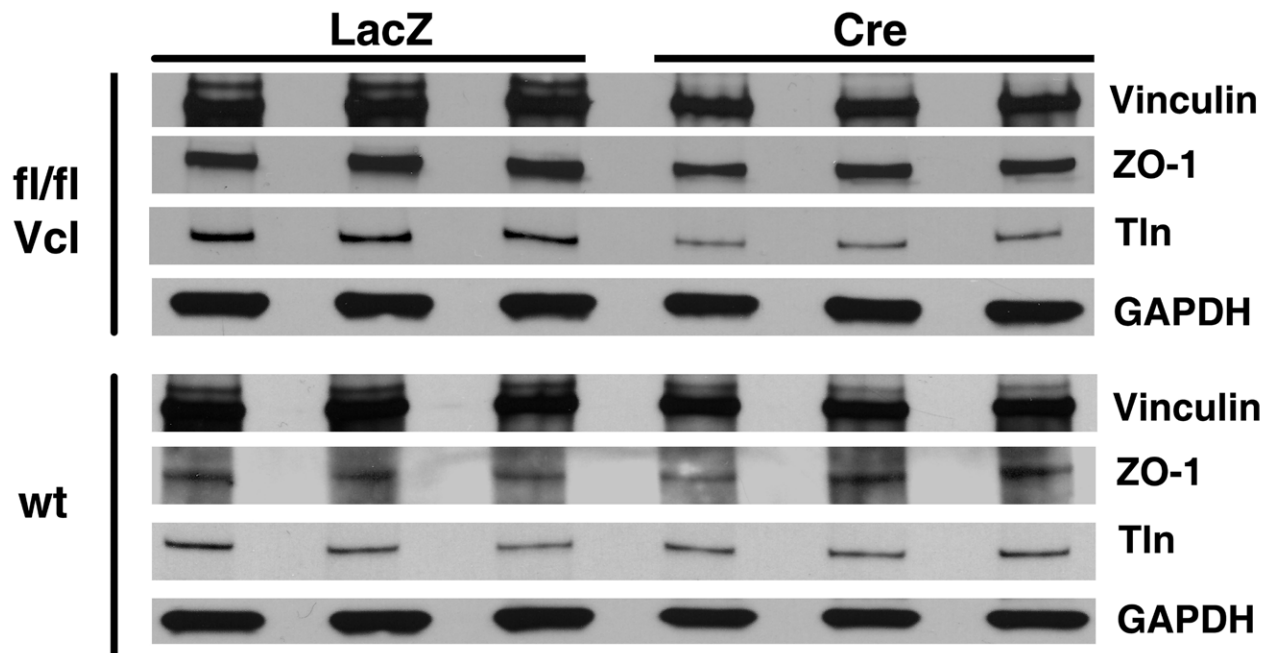

**Supplemental Figure S1** - AdV-Cre does not reduce Vcl or Vcl-associated proteins in wild-type NRVMs. AdV-LacZ (LacZ) and AdV-Cre (Cre) infected NRVM protein lysates were analyzed by Western blotting for expression of Vcl and Vcl-associated proteins.

**Top Panel** - Lysates from homozygous floxed (fl/fl) Vcl NRMVs

**Lower Panel** - Lysates from wild-type (wt) NRVMs (no floxed Vcl allele).

**Table S1. Primer sequences and reference templates used to generate Vcl and Tjp1 (ZO-1) hybrid genes for yeast-two hybrid assays.**

|                                          | <b>Baits (in pGBKT7)</b>                                                     |
|------------------------------------------|------------------------------------------------------------------------------|
| <b>Vcl (0-3.2kb)</b><br>(Construct a)    | F (1-20): ATGCCGGTGTTTCACACGCGT<br>R (3201-3182): CTA CTGGTACCAGGGAGTCT      |
| <b>Vcl (0-2.5kb)</b><br>(Construct b)    | F (1-20): ATGCCGGTGTTTCACACGCGT<br>R (2558-2539): CGTAGCTGTTCAAGGTCTGG       |
| <b>Vcl (1.7-3.2kb)</b><br>(Construct c)  | F (1774-1794): ACTCAAGAGGTATCCGATGTT<br>R (3201-3182): CTA CTGGTACCAGGGAGTCT |
| <b>Tjp1 (0-1.5kb)</b><br>(Construct 2)   | F (1-20): ATGTCCGCCAGGGCCCGCGGC<br>R (1541-1522): TCTGATTCTACAATGCGGCG       |
| <b>Tjp1 (1.2-2.5kb)</b><br>(Construct 3) | F (1201-1220): GTCAGCCCTTCTGATGGTGC<br>R (2568-2549): TTGATCAGTG TAGGCCCCCGC |
| <b>Tjp1 (0-0.9kb)</b><br>(Construct 4)   | F (1-20): ATGTCCGCCAGGGCCCGCGGC<br>R (900-881): GAATGGTCTGATGCTAGTGA         |
| <b>Tjp1 (0.8-1.2)</b><br>(Construct 5)   | F (790-809): GAGCGGGCTACCTTACTGAA<br>R (1265-1246): ATGCTGGGCCTAAGTATCCC     |
| <b>Tjp1 (1.2-1.5kb)</b><br>(Construct 6) | F (1201-1220): GTCAGCCCTTCTGATGGTGC<br>R (1541-1522): TCTGATTCTACAATGCGGCG   |
| <b>Tjp1 (1.2-1.8kb)</b><br>(Construct 7) | F (1201-1220): GTCAGCCCTTCTGATGGTGC<br>R (1805-1786): CAGAAGTCTGCCCGATCACC   |

  

|                                          | <b>Reporters (in pGADT7)</b>                                                 |
|------------------------------------------|------------------------------------------------------------------------------|
| <b>Tjp1 (0-2.5kb)</b><br>(Construct 1)   | F (1-20): ATGTCCGCCAGGGCCCGCGGC<br>R (2568-2549): TTGATCAGTG TAGGCCCCCGC     |
| <b>Tjp1 (0-1.5kb)</b><br>(Construct 2)   | F (1-20): ATGTCCGCCAGGGCCCGCGGC<br>R (1541-1522): TCTGATTCTACAATGCGGCG       |
| <b>Tjp1 (1.2-2.5kb)</b><br>(Construct 3) | F (1201-1220): GTCAGCCCTTCTGATGGTGC<br>R (2568-2549): TTGATCAGTG TAGGCCCCCGC |
| <b>Vcl (0-3.2kb)</b><br>(Construct a)    | F (1-20): ATGCCGGTGTTTCACACGCGT<br>R (3201-3182): CTA CTGGTACCAGGGAGTCT      |

Primer sequences are shown from 5'→3' and designed as follows. Forward (F) primers were designed to incorporate one random nucleotide, a linker restriction site in frame with the CDS, as well as the Kozak sequence (gccacc) and a START codon (if not present within cDNA). Reverse (R) primers were designed to incorporate one random nucleotide and a linker restriction site. Reference sequences: Mus musculus Vinculin (Vcl) CDS, NM\_009502.4, Mus musculus Tight junction protein 1 (Tjp1) CDS, transcript variant 1, NM\_009386.2.
